# Supplementary material for: Childbirth Care among SARS-CoV-2 Positive Women in Italy
Source: MDPI journal article supplement (doi:10.3390/ijerph18084244), 2021-04-16
Supplement: s1 [file s1]

## **ItOSS National network of maternity units**

### **Piedmont Region**

Elena Amoruso *Ospedale Sant'Andrea Vercelli*; Alberto Arnulfo, Enrico Finale *Stabilimento Ospedaliero Castelli Verbania*; Rossella Attini, Marisa Biasio, Luca Marozio, Clara Monzeglio *OIRM Sant'Anna - AOU Città della Salute e della Scienza di Torino*; Maria Bertolino, Andrea Guala *Ospedale San Biagio Domodossola*; Silvia Bonassisa, Alberto De Pedrini *Ospedale Maggiore della Carità Novara*; Mario Canesi, Sara Cantoira *Ospedale Maria Vittoria Torino*; Paola Capelli *Istituto SS. Trinità Borgomanero*; Ilaria Careri, *Ospedale Martini Torino*; Luigi Carratta *Ospedale S. Spirito Casale Monferrato*; Ilaria Costaggini *Ospedale degli Infermi Rivoli*; Tania Cunzolo *Presidio Osp. Cardinal G. MASSAIA Asti*; Enza De Fabiani, Andrea Villasco *Azienda Ospedaliera Ordine Mauriziano Torino*; Cinzia Diano *Ospedale Maggiore Chieri*; Fiorenza Droghini, Paola Rota *Ospedale Santa Croce Moncalieri*; Daniela Kozel, Vittorio Aguggia *Ospedale Civile SS. Antonio e Biagio Alessandria*; Francesca Maraucci *Ospedale degli infermi Biella*; Gisella Martinotti *Ospedale SS. Pietro e Paolo Borgosesia*; Maria Milano, Antonia Novelli *Ospedale Civile Mondovì*; Giovanna Oggè *Ospedale maggiore SS. Annunziata Savigliano*; Simona Pelissetto *Ospedale Civile di Ivrea*; Pasqualina Russo *Presidio Osp. riunito Ciriè*; Manuela Scatà *Ospedale Michele e Pietro Ferrero di Verduno*; Federico Tuo, Valentina Casagrande *Ospedale San Giacomo Novi Ligure/Tortona*; Concetta Vardè *Ospedale Agnelli Pinerolo*; Elena Vasario *Azienda Ospedaliera S. Croce e Carle Cuneo*; Daniela Ventrella *Ospedale Civico Chivasso*

### **Valle D'Aosta Region**

Livio Leo *Umberto Parini Aosta*

### **Liguria Region**

Silvia Andrietti *ASLI Imperiese*; Federica Baldi *Ospedale San Paolo Savona*; Angelo Cagnacci, Federica Laraud *IRCCS AOU San Martino*; Franco Camandona, Domenico Grimaldi *Ospedale Galliera di Genova*; Maria Franca Corona, Massimiliano Leoni *Ospedale Civile Sant'Andrea La Spezia*; Paolo Massirio, Luca Ramenghi *IRCCS Giannina Gaslini*

### **Lombardy Region**

Debora Balestrieri *Ospedale di Cittiglio*; Federica Baltaro *Ospedale Niguarda di Milano*; Pietro Barbacini, Elisabetta Venegoni *Ospedale di Magenta*; Michele Barbato *Ospedale di Melegnano*; Lorena Barbetti *Ospedale di Esine*; Paolo Beretta *Ospedale di Como*; Bruno Bersellini *Ospedale di Sondrio*; Stefano Bianchi *Ospedale San Giuseppe di Milano*; Antonia Botrugno *Ospedale di Casalmaggiore*; Donatella Bresciani *Ospedale di Desenzano*; Alessandro Bulfoni *Pio X Humanitas di Milano*; Carlo Bulgheroni *Ospedale di Gallarate*; Orlando Caruso, Elena Pinton *Ospedale di Chiari*; Massimo Ciammella *Ospedale di Seriate*; Elena Crestani, Giulia Pellizzari *Ospedale di Pieve di Coriano*; Antonella Cromi *Ospedale di Varese*; Serena Dalzero, Nikita Alfieri *Ospedale San Paolo di Milano*; Rosa Di Lauro, Carla Foppoli *Ospedale di Sondalo*; Patrizia D'Oria, *Ospedale di Alzano*; Santina Ermito *Ospedale di Piario*; Massimo Ferdico *Ospedale di Vimercate*; Maria Fogliani, Guido Stevanazzi *Ospedale di Legnano-Cuggiono*; Roberto Fogliani *Ospedale di Sesto San Giovanni*; Ambrogio Frigerio *Ospedale di Rho*; Eleonora Fumagalli *Ospedale Macedonio Melloni ASST FBF-Sacco di Milano*; Roberto Garbelli *Brescia Istituto Clinico S. Anna*; Daniela Gatti *Ospedale di Manerbio*; Giampaolo Grisolia, Serena Varalta *Ospedale di Mantova*; Paolo Guarnerio *Ospedale San Carlo di Milano*; Enrico Iurlaro, Marta Tondo *IRCCS Cà Granda Ospedale Maggiore Policlinico-Mangiagalli Milano*; Stefano Landi *Ospedale di Gravedona*; Mario Leonardi *Ospedale di Iseo*; Stefania Livio, Chiara Tasca *Ospedale Buzzi ASST FBF-Sacco di Milano*; Anna Locatelli *Ospedale di Carate*; Giuseppe Losa *Ospedale di Melzo*; Massimo Lovotti *Como Valduce*; Anna Minelli *Ospedale di Gavardo*; Luisa Muggiasca *Ospedale di Garbagnate*; Giuseppe Nucera *Ospedale di Busto Arsizio*; Alessandra Ornati *Ospedale di*

*Vigevano; Luisa Patanè ASST Papa Giovanni XXIII Bergamo; Antonio Pellegrino Ospedale di Lecco; Francesca Perotti, Arsenio Spinillo Fondazione IRCCS Policlinico San Matteo di Pavia; Armando Pintucci Ospedale di Desio; Ezio Pozzi Ospedale di Broni Stradella- Ospedale di Voghera, Federico Prefumo Spedali Civili di Brescia; Anna Catalano Brescia Fondazione Poliambulanza; Aldo Riccardi Ospedale di Cremona; Alessia Chiesa Ospedale di Ponte San Pietro; Tazio Sacconi Ospedale di Asola; Valeria Savasi, Silvia Corti Ospedale Sacco di Milano; Ubaldo Seghezzi Ospedale di Saronno; Vincenzo Siliprandi Ospedale di Crema; Marco Soligo, Beatrice Negri Ospedale di Lodi; Paolo Valsecchi Ospedale San Raffaele; Laura Vassena Ospedale di Merate; Federica Brunetti, Patrizia Vergani Fondazione MBBM Ospedale San Gerardo Monza; Antonella Villa Ospedale di Treviglio; Matteo Zanfrà Ospedale di Tradate; Alberto Zanini Ospedale di Erba*

### **Autonomous province of Bozen**

*Martin Steinkasser, Micaela Veneziano Ospedale Centrale di Bolzano*

### **Autonomous province of Trento**

*Pietro Dal Rì, Fabrizio Taddei UO Rovereto; Roberto Luzietti UO Cles; Saverio Tateo UO Trento; Fabrizia Tenaglia UO Cavalese*

### **Veneto Region**

*Giuseppe Angeloni Ospedale di Piove di Sacco; Antonio Azzena Ospedale di Vittorio Veneto; Gianluca Babbo Ospedale di Portogruaro; Roberto Baccichet, Cristina Napolitano Ospedale di Oderzo; Valentino Bergamini Ospedale Borgo Trento; Luca Bergamini Ospedale di Chioggia; Enrico Busato, Monica Zannol Ospedale di Treviso; Pietro Catapano, Marco Gentile Ospedale Mater Salutis – Legnago; Marcello Ceccaroni Ospedale Sacro Cuore don Calabria Negrar; Gianluca Cerri Ospedale SS. Giovanni e Paolo – Venezia; Andrea Cocco Ospedale di Asiago; Carlo Dorizzi Ospedale di Schiavonia; Laura Favretti Ospedale S. Maria del Prato – Feltre; Riccardo Federle, Antonino Lo Re Ospedale P. Pederzoli - Casa di cura Privata Spa; Massimo Franchi, Marina Sangaletti Azienda Ospedaliera di Verona; Franco Garbin Ospedale di Dolo; Maria Teresa Gervasi, Daniela Truscia Azienda Ospedaliera di Padova; Dimosthenis Kaloudis Ospedale di San Bonifacio; Domenico Lagamba Ospedale di Castelfranco Veneto; Giovanni Martini Ospedale di Valdagno; Carlo Maurizio Ospedale di Mirano; Yoram J. Meir Ospedale di Bassano del Grappa; Alessia Pozzato Ospedale di Adria - Ospedale di Rovigo; Marcello Rigano Ospedale di Camposampiero; Cesare Romagnolo Ospedale all'Angelo di Mestre; Roberto Rulli Ospedale di Cittadella; Giuseppe Sacco Ospedale di San Donà di Piave; Maria Grazia Salmeri Ospedale di Montebelluna; Marcello Scollo Ospedale di Santorso; Francesco Sinatra Ospedale di Conegliano; Gianluca Straface Casa di cura Abano; Fabio Gianpaolo Tandurella Ospedale di Pieve di Cadore e Ospedale San Martino – Belluno; Marco Torrazzina Ospedale di Bussolengo - Ospedale di Villafranca; Paolo Lucio Tumaini Ospedale di Arzignano; Giuliano Zanni Ospedale di Vicenza*

### **Friuli-Venezia Giulia Region**

*Emanuele Ancona Ospedale S. Giorgio di Pordenone; Michela De Agostini Ospedale di Palmanova; Gianpaolo Maso, Alice Sorz IRCSS Burlo Garofolo Trieste; Edlira Muharremi S. M. degli Angeli Ospedale di Pordenone; Alessandra Nicoletti Ospedale S.Daniele di Tolmezzo; Roberta Pinzano Ospedale S.Maria dei Battuti-San Vito al Tagliamento; Alessia Sala Ospedale Santa Maria della Misericordia-Udine; Lucia Zanazzo, Ospedale di Monfalcone*

### **Emilia-Romagna Region**

*Lorenzo Aguzzoli, Alice Ferretti Ospedale S.M. Nuova Reggio Emilia; Patrizio Antonazzo, Lucrezia Pignatti Ospedale Bufalini Cesena; Angela Bandini, Isabella Strada Ospedale G.B .Morgagni -L. Pierantoni Forlì; Chiara Belosi Ospedale degli Infermi Faenza; Renza Bonini, Maria Cristina Ottoboni Ospedale Guglielmo Da Saliceto Piacenza; Fabrizio Corazza, Paola Pennacchioni Ospedale Ss. Annunziata Cento; Fabio Facchinetti,*

Giliana Ternelli *Azienda Ospedaliero-Universitaria Modena*; Alessandro Ferrari, Cristina Pizzi, *Ospedale S.M. Bianca Mirandola*; Tiziana Frusca, Stefania Fieni *Azienda Ospedaliero-Universitaria Parma*; Maria Cristina Galassi, Federica Richieri, *Nuovo Ospedale Civile Di Sassuolo S.P.A.*; Francesco Giambelli, Carlotta Matteucci *Ospedale S.M. Delle Croci Ravenna*; Pantaleo Greco, Danila Morano *Azienda Ospedaliero-Universitaria Ferrara*; Marinella Lenzi, Iaria Cataneo, *Ospedale Maggiore Bologna*; Gialuigi Pilu, Marisa Bisulli, *Azienda Ospedaliero-Universitaria Bologna*; Maria Cristina Selleri *Ospedale di Bentivoglio*; Federico Spelzini, Elena De Ambrosi, *Ospedale Infermi Rimini*; Paolo Venturini, Francesca Tassinati *Ospedale B. Ramazzini Carpi*; Stefano Zucchini, Barbara Paccaloni, *Ospedale S.M. della Scaletta Imola*

### **Tuscany Region**

Andrea Antonelli, Carlotta Boni *Ospedale Civile Cecina*; Maria Paola Belluomini, *S. Francesco Barga - PO Valle del Serchio e Generale Provinciale Lucca - PO San Luca*, Rosalia Bonura, *S. Maria della Gruccia - Ospedale del Valdarno*, Stefano Braccini, *SS. Cosimo e Damiano Pescia - Osp della Valdinievole*, Giacomo Bruscoli e Pasquale Mario Florio, *Nuovo Ospedale San Jacopo di Pistoia*, Giovanna Casilla, *SS. Giacomo e Cristoforo Massa - PO Zona Apuana*, Anna Franca Cavaliere, *Ospedale Santo Stefano Prato*, Marco Cencini, *Ospedali Riuniti della Val di Chiana*, Venere Coppola e Laura Migliavacca, *Ospedale Misericordia Grosseto*, Barbara De Santi, *PO Felice Lotti Pontedera*, Paola Del Carlo, *Ospedale S. Giovanni Di Dio Torregalli*, Carlo Dettori, *Nuovo Ospedale di Borgo S. Lorenzo*, Mariarosaria Di Tommaso e Serena Simeone, *Careggi - CTO Firenze - AOU*, Giuseppe Eremita, *Civile Elbano Portoferraio*, Sara Failli, *Ospedale Area Aretina Nord Arezzo*, Paolo Gacci, *S.M. Annunziata Bagno a Ripoli - Osp Fiorentino Sud Est*, Alessandra Meucci, *Le Scotte Siena - Azienda ospedaliera universitaria*, Filippo Ninni, *Riuniti Livorno*, Barbara Quirici, *Ospedale Unico Versilia*, Alessia Sacchi, *Ospedale dell'Alta Val d'Elsa Poggibonsi*, Cristina Salvestroni, *Ospedale S. Giuseppe Empoli*, Sara Zullino, *Ospedali Pisani Pisa - Az universitaria*

### **Umbria Region**

Nazzareno Cruciani, Fabrizio Damiani *Ospedale San Giovanni Battista Foligno*; Leonardo Borrello *Azienda Ospedaliera Santa Maria di Terni*; Gian Carlo Di Renzo, Giorgio Epicoco *Azienda Ospedaliera Santa Maria della Misericordia di Perugia*; Ugo Indraccolo, Donatello Torrioli, *Ospedale di Città di Castello*

### **Marche Region**

Andrea Ciavattini, Sara D'Eusania *AOU - Ospedali Riuniti di Ancona*; Filiberto Di Prospero *Ospedale di Civitanova Marche*; Rebecca Micheletti, Claudio Cicoli *Azienda Ospedaliera Ospedali Riuniti Marche Nord*

### **Lazio Region**

Francesco Antonino Battaglia, Immacolata Marcucci *PO Santa Maria Goretti Latina*; Leonardo Boccuzzi, Patrizia Ruocco *Ospedale De Santis di Genzano*; Marco Bonito *Ospedale San Pietro Fatebenefratelli Roma*; Maria Clara D'Alessio *San Filippo Neri Roma*; Carlo De Angelis *Casa di Cura Fabia Mater Roma*; Donatella Dell'Anna *Ospedale S. Eugenio*; Daniele Di Mascio, Paola Pecilli *Umberto I - Policlinico di Roma*; Sergio Ferrazzani *Policlinico Universitario Fondazione Agostino Gemelli - Roma*; Gregorio Marco Galati *Ospedale Madre Giuseppina Vannini Istituto delle Figlie di S. Camillo Roma*; Maria Grazia Frigo *Fatebenefratelli San Giovanni Calibita - Isola Tiberina*; Paolo Gastaldi *Ospedale Santo Spirito Roma*; Rita Gentile *Presidio Ospedaliero Giovan Battista Grassi Ostia*; Giovanni Grossi *Ospedale Sandro Pertini Roma*; Giorgio Nicolanti, Patrizio Raggi *Ospedale Belcolle Viterbo*; Flavia Pierucci *Azienda Ospedaliera San Camillo Forlanini Roma*; Giancarlo Paradisi, Maria Rita Pecci *Ospedale Fabrizio Spaziani Frosinone*; Giovanni Testa *Casa di cura Città di Aprilia*; Barbara Vasapollo *Policlinico Casilino Roma*; Barbara Villaccio *Ospedale San Pietro Fatebenefratelli Roma*

## **Abruzzo Region**

Fabio Benucci *Sant'Omero*; Paola Caputo *Sulmona*; Sandra Di Fabio, Maurizio Guido *L'Aquila*; Antonio Di Francesco *Lanciano*; Francesca di Sebastiano, Diego Gazzolo, Marco Liberati *Chieti*; Anna Marcozzi *Teramo*; Francesco Matrullo *Vasto*; Maurizio Rosati, Gabriella Scorpio *Pescara*; Giuseppe Ruggeri *Avezzano*; Alessandro Santarelli *Ospedale di Sant'Omero*

## **Molise Region**

Daniela Simeone *Ospedale di Campobasso*

## **Campania Region**

Annalisa Agangi *Ospedale Evangelico Villa Betania*; Salvatore Ercolano *P.O. "S. Leonardo" di Castellammare di Stabia*, Luigi Cobellis, Annunziata Mastrogiamco *Ospedale di Caserta*; Maria Vittoria Locci *AOU Federico II Napoli*

## **Puglia Region**

Luca Loiudice *Bari - Presidio Mater Dei*; Antonio Belpiede *Barletta 'Mons. Dimiccoli'*; Mariano Cantatore *L. Bonomo Andria*; Ettore Cicinelli, Antonella Vimercati *Bari - Policlinico Ginecologia*; Aldo D'Aloia, Sabina Di Biase, Antonio Lacerenza *AOU "OO RR Foggia"*; Alessandro Dalfiero *Cerignola*; Gerardo D'Ambrogio *Galatina "Santa Caterina Novella"*; Nicola Del Gaudio *Castellaneta*; Paolo Demarzo *San Severo Teresa Masselli Mascia*; Giovanni Di Vagno *Bari - San Paolo*; Giuseppe Laurelli *Casa Sollievo Dalla Sofferenza - S. Giovanni Rotondo*; Roberto Lupo *Gallipoli*; Nicola Macario *Altamura*; Antonio Malvasi, *Bari - Casa Di Cura Santa Maria*; Guido Maurizio, Elisabetta Monteduro, *Acquaviva "Miulli"*; Andrea Morciano *Cardinale G. Panico Di Tricase*; Lucio Nichilo *Umberto I Corato*; Anna Maria Nimis *Francavilla Fontana*; Antonio Perrone *Lecce Vito Fazzi*; Elena Rosa Potì *Brindisi "Perrino"*; Sabino Santamato *Monopoli Putignano*; Emilio Stola *Taranto*; Antonio Tau *Scorrano*; Mario Vicino *Bari - Di Venere*; Martino Vinci *Martina Franca*

## **Basilicata Region**

Giampiero Adornato *Policoro*; Francesco Bernasconi *Melfi*; Alfonso Chiacchio *Lagonegro*; Sergio Schettini, Rocco Paradiso *Azienda Ospedaliera Regionale San Carlo – Potenza*; Giuseppe Trojano *Matera*

## **Calabria Region**

Carmelina Ermio *Ospedale Jazzolino - Vibo Valentia*; Michele Morelli, Rossella Marzullo *Ospedale Annunziata – AO Cosenza*; Stefano Palomba *Ospedali Riuniti di Reggio Calabria*; Morena Rocca *Azienda Ospedaliera "Pugliese Ciaccio" di Catanzaro*

## **Sicily Region**

Vincenzo Aidala, *Castiglione Prestianni-Bronte*; Luigi Alio, Giuseppina Orlando *ARNAS Civico di Cristina Benfratelli-Palermo*; Maria Grazia Arena, Santo Recupero *S. Marco (ex V. Emanuele S. Bambino)-Catania e Osp. Generale-Lentini*; Salvatore Bevilacqua, Fabrizio Quartararo *Casa di cura Candela SPA-Palermo*; Rocco Billone *Civico Partinico e Dei Bianchi-Corleone*; Giuseppe Bonanno, *Maria Paternò Arezzo-Ragusa*; Antonio Bucolo, *Umberto I-Siracusa*; Claudio Campione, *Casa di cura prof. Falcidia-Catania*; Giuseppe Canzone, *S. Cimino-Termini Imerese*; Angelo Caradonna, *V. Emanuele II-Castelvetrano*; Sebastiano Caudullo e Cosimo Raffone, *AO Papardo-Messina*; Giovanni Cavallo, *PO Maggiore-Modica*; Antonio Cianci, Michele Fichera *V. Emanuele Rodolico-Catania*; Salvatore Corsello, Sergio Di Salvo *Casa di cura Villa Serena-Palermo*; Gaspare Cucinella, Maria Elena Mugavero *Villa Sofia - Cervello-Palermo*; Rosario D'Anna, *AOU G. Martino-Taormina*, Maria Rosa D'anna, *Buccheri La Ferla-Palermo*; Maria Di Costa, *Basilotta-Catania*; Giuseppe Ettore, *ARNAS Garibaldi Nesima-Catania*; Giovanni Falzone, Marta Fauzia *Umberto I-Nicosia*; Roberto

Fazio, *G. Fogliani-Milazzo e Lipari*; Matteo Giardina *Ospedale Paolo Borsellino di Marsala*; Michele Gulizzi e Francesco La Mantia, *G. F. Ingrassia-Palermo*; Laura Giambanco, *S. Antonio Abate-Erice e B. Nagar-Pantelleria*; Salvatore Incandela, *S. Giovanni di Dio -Agrigento e Giovanni Paolo II-Sciacca*; Lilli Maria Klein *S. Vincenzo-Enna e Barone Romeo-Patti*; Michele La Greca, Venera Mille, *M. SS. Addolorata-Biancavilla*; Luigi Li Calsi *S. Giacomo d'Altopasso-Licata*; Emilio Lo Meo, Paolo Scrollo *Cannizzaro-Catania*; Vincenzo Miceli, *S. Raffaele Giglio-Cefalù*; Maria Pia Militello, *S. Marta e S. Venera-Acireale*; Alfio Mirena, *Istituto clinico Vidimura (ex Casa di cura Gretter e Lucina)-Catania*; Pietro Musso, *Abele Ajello-Mazara del Vallo*; Michele Palmieri, *V. Emanuele-Gela*; Concetta Remigia Pettinato, Angelo Tarascio *Gravina - Caltagirone-Caltagirone*; Vincenzo Scattarreggia *Barone Lombardo-Canicattì*; Antonio Schifano *R. Guzzardi-Vittoria*; Calogero Selvaggio *S. Elia-Caltanissetta*; Luigi Triolo *Casa di cure Triolo Zanca SPA-Palermo*; Renato Venezia *P. Giaccone-Palermo*

### **Sardinia Region**

Speranza Piredda *Civile Alghero*; Giangavino Peppi *Giovanni Paolo II - Olbia*; Giovanna Pittorra *S. Francesco - Nuoro*; Gianfranco Depau *Nostra Signora della Mercede - Lanusei*; Gianfranco Puggioni *S. Martino - Oristano*; Loredana Pagliara *Nostra Signora di Bonaria - San Gavino*; Giulietta Ibba *CTO - Iglesias*; Caterina Tronci, *SS Trinità - Cagliari*; Giampiero Capobianco, *AOU Sassari*; Alessandra Meloni *Duilio Casula Monserrato AOU - Cagliari*; Francesca Palla *S. Michele AO Brotzu - Cagliari*
